# Supplementary material for: Fc-Mediated Functions of Porcine IgG Subclasses
Source: PubMed Central journal article supplement (PMC9218351; doi:10.3389/fimmu.2022.903755), 2022-06-09
Supplement: DataSheet_1.pdf [file DataSheet_1.pdf]

## Fc mediated functions of porcine IgG subclasses

### Supplemental Information

#### Supplementary Figure 1

**A**

| % Virus neutralization by mAbs at 10 $\mu$ g/ml |        |    |                    |     |                    |     |                    |     |                          |
|-------------------------------------------------|--------|----|--------------------|-----|--------------------|-----|--------------------|-----|--------------------------|
|                                                 | X-179A |    | K163Q<br>(Sa site) |     | K163E<br>(Sa site) |     | K130E<br>(Ca site) |     | Comments                 |
| pb39                                            | 93     | 93 | 100                | 99  | 89                 | 103 | 99                 | 99  | Neutralised all variants |
| 2-12C                                           | 92     | 95 | 100                | 100 | 89                 | 100 | 3                  | 16  | Control for K130E        |
| MEDI8852                                        | 92     | 92 | 100                | 100 | 82                 | 102 | 98                 | 100 | Stem mAb control         |
| T26A                                            | 92     | 93 | 5                  | 15  | -3                 | 61  | 98                 | 99  | Control for K163E/Q      |

**B**

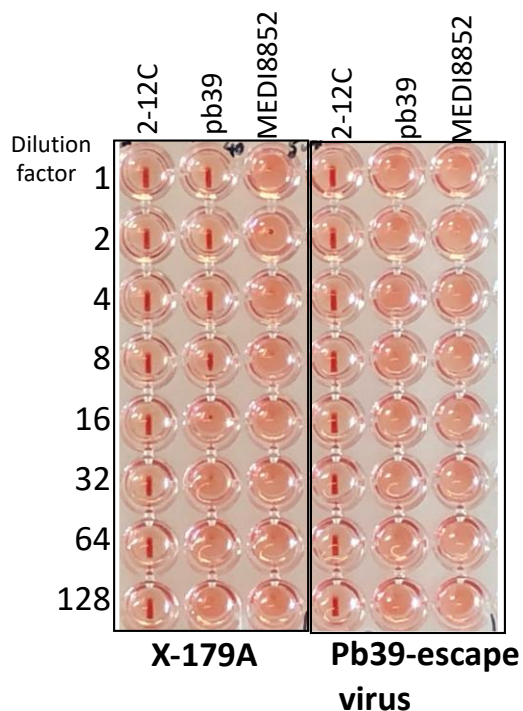

**Suppl Figure 1: A) Virus neutralisation of X-179A and its variants by monoclonal antibodies. B) Hemagglutination inhibition (HAI) assay. MAb 2-12C and stem mAb MEDI8852 starting at 5  $\mu$ g/ml and pb39 starting at 40  $\mu$ g/ml. Pb39 HAI wildtype virus at 5  $\mu$ g/ml and do not HAI the escape virus.**

Supplementary Figure 2

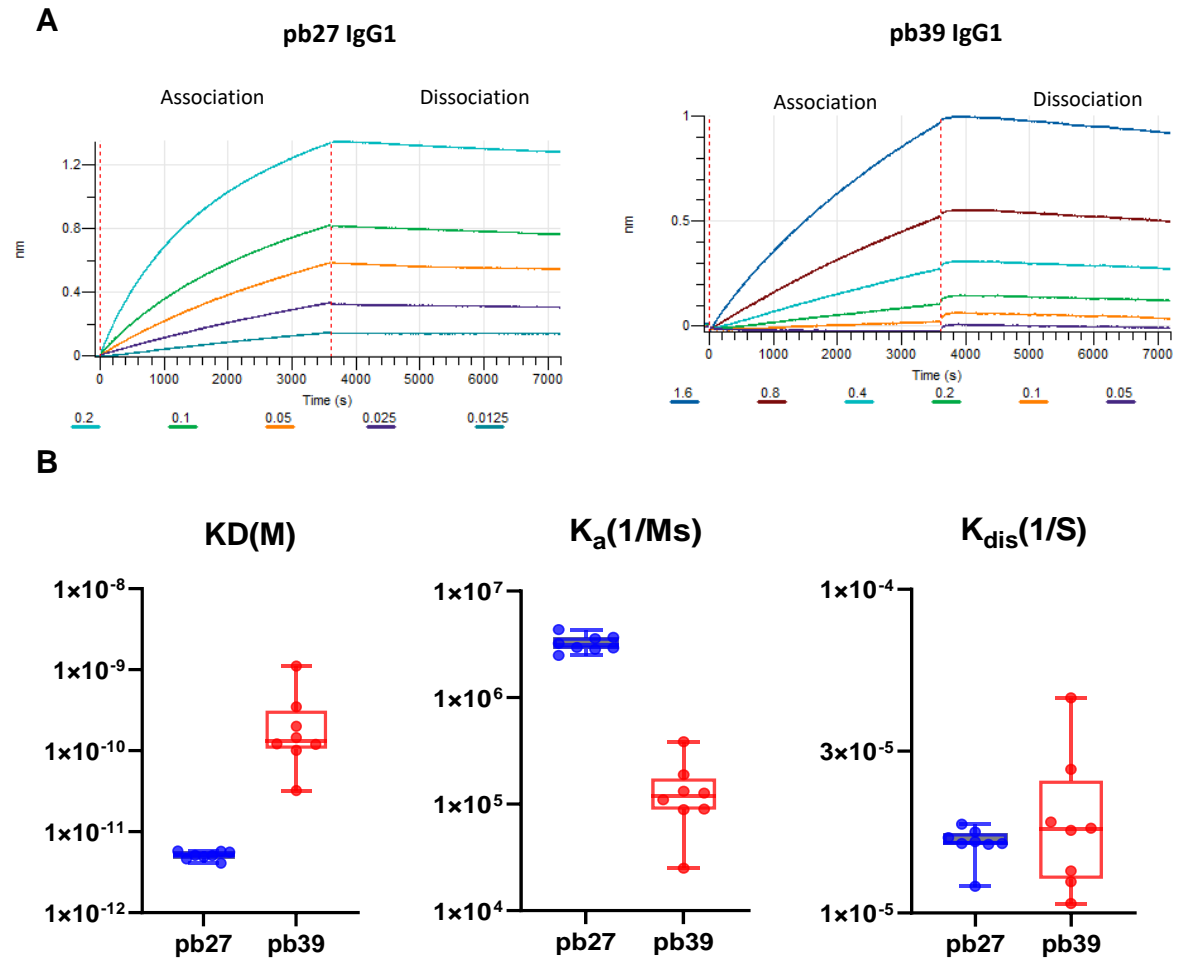

**Suppl Figure 2: Binding characteristics of pb27 and pb39 subclasses as determined by bilayer interferometry.** **A)** Association and dissociation between biosensor-immobilised pb27 IgG1 and pb39 IgG1, and purified virus. Virus concentrations (nM) are shown below each graph. **B)** Binding affinity, association rate, and dissociation rate for all pb27 and pb39 IgG subclasses. Dots show individual subclasses, box the median value and whiskers represent the minimum and maximum value.

### Supplementary Figure 3

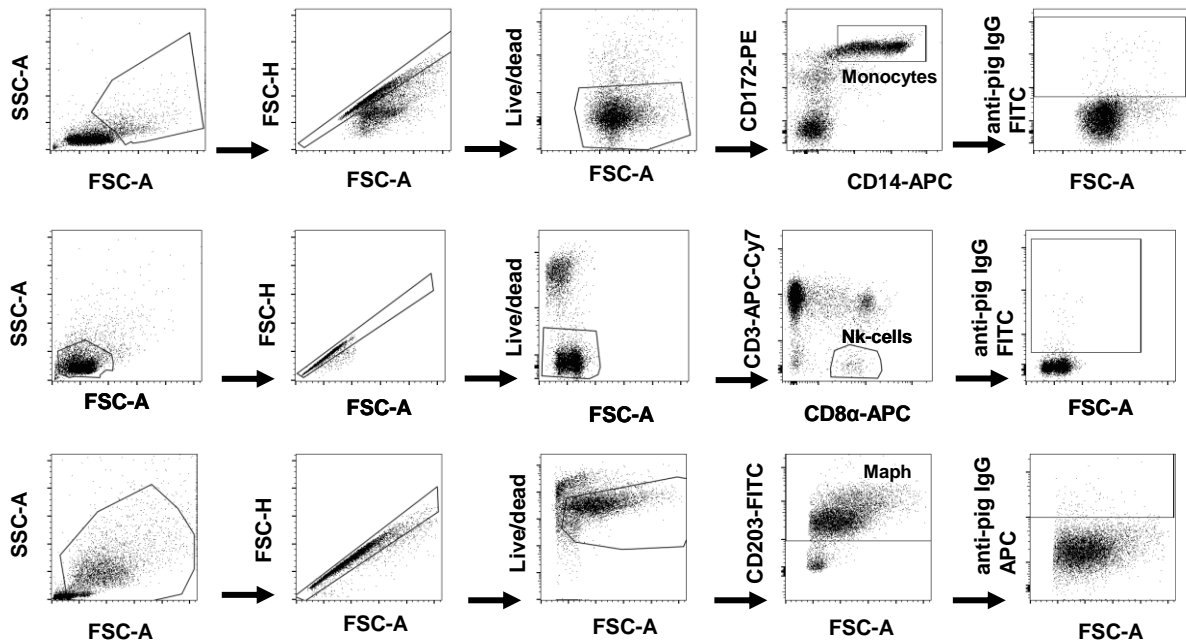

**Supl Figure 3: Gating strategy for identification of monocytes, macrophages and NK cells.** Successive gates were applied to identify FSC/SSC monocytes, lymphocytes and macrophages, singlet cells, live, CD172a+CD14+ monocytes, CD3-CD8 $\alpha$ + NK cells and CD203+ macrophages.

## Supplementary Figure 4

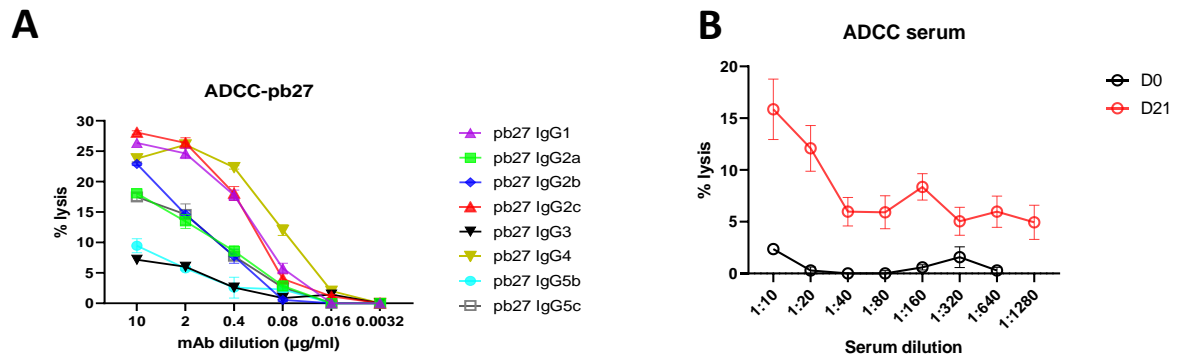

**Suppl Figure 4: Antibody dependent cellular cytotoxicity of IgG subclasses and immune serum.** ADCC activity of pb27 IgG subclasses (**A**) and immune sera (**B**) on MDCK-HA in the presence of overnight stimulated PBMC.
